# Supplementary material for: In situ construction of the BiOCl/Bi2Ti2O7 heterojunction with enhanced visible-light photocatalytic activity
Source: Royal Society of Chemistry journal article supplement (doi:10.1039/c8qi01347k), 2019-01-01
Supplement: c8qi01347k1.pdf [file c8qi01347k1.pdf]

# Supporting Information

## ***In Situ* Construction of BiOCl/Bi<sub>2</sub>Ti<sub>2</sub>O<sub>7</sub> Heterojunction with Enhanced Visible light Photocatalytic Activity**

*Siyang Niu, Ruoyu Zhang, Zhiyu Zhang, Jiming Zheng, Yang Jiao, Chongfeng Guo\**

*National Key Laboratory of Photoelectric Technology and Functional Materials (Culture Base) in Shaanxi Province, National Photoelectric Technology and Functional Materials & Application of Science and Technology International Cooperation Base, Institute of Photonics & Photon-Technology and Department of Physics, Northwest University, Xi'an 710069, China;*

---

\* Author to whom correspondence should be addressed

E-mail: [guocf@nwu.edu.cn](mailto:guocf@nwu.edu.cn) (Prof. Guo)

Tel & Fax: ±86-29-88302661

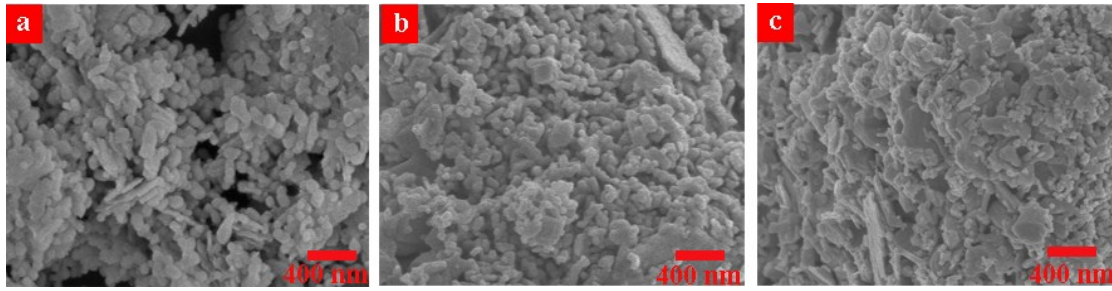

**Figure S1.** SEM images of BOC/BTO heterojunction with different mass ratio: (a) 2:1, (b) 4:1 and (c) 8:1.

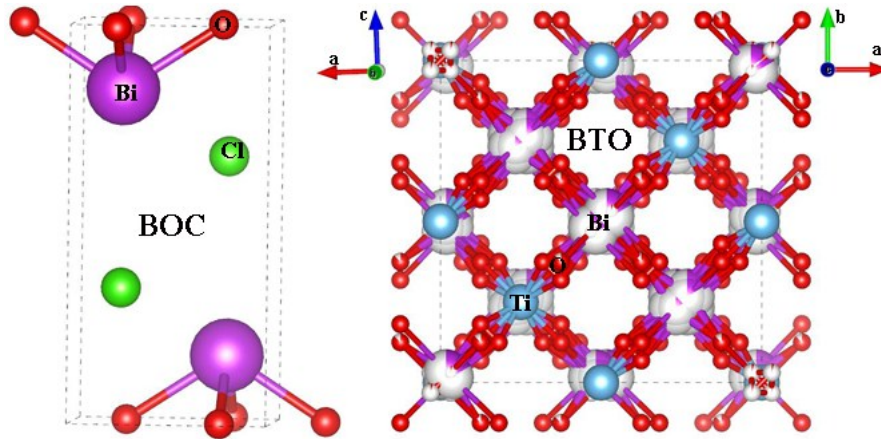

**Figure S2.** The optimized model of (a) BOC and (b) BTO

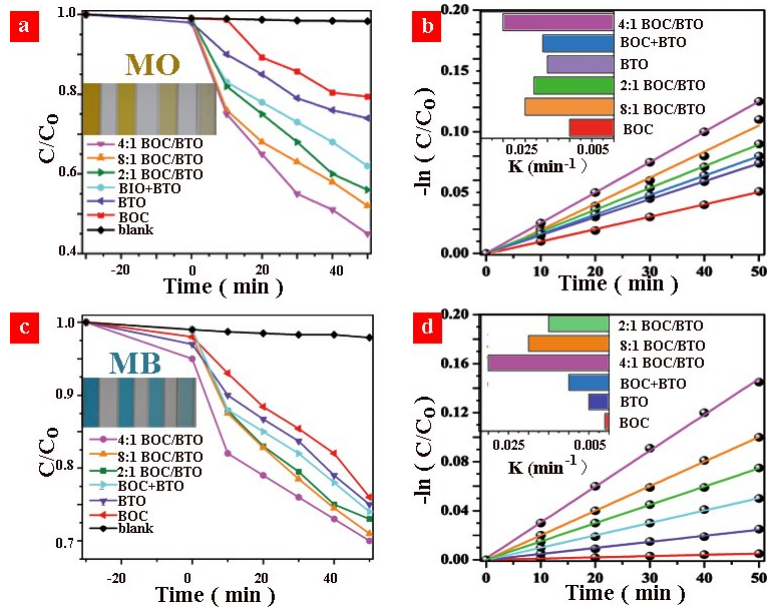

**Figure S3.** Under visible light irradiation, photocatalytic degradation of (a) MO and (c) MB with different irradiation time; (b, d) the plots of  $\ln(C/C_0)$  vs irradiation time and reaction rate constants for different samples.

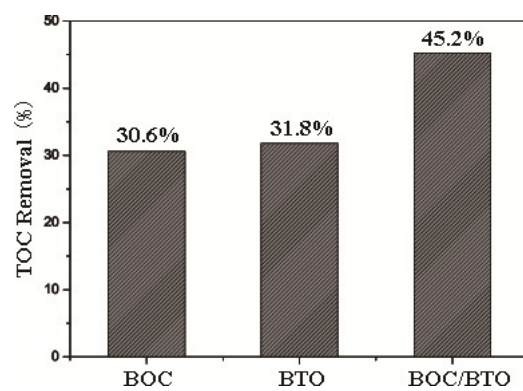

**Figure S4.** The TOC removal of RhB in the presence of various catalysts under visible light irradiation for 50 min
